# Supplementary material
Source: publisher figshare collection journal article supplement (https://adisjournals.figshare.com/ndownloader/files/37860204)
Supplement: Supplementary file 1 [file 37860204]

# PRESTO 2: an international survey to evaluate patients' injection experiences with the latest devices/formulations of long-acting somatostatin analog therapies

D O'Toole, PL Kunz, SM Webb, G Goldstein, S Khawaja, M McDonnell, S Boiziau, D Gueguen, A Houchard, A Ribeiro-Oliveira Jr, A Prebtani

**Objective:** To compare and understand the injection experience of patients with acromegaly or NETs receiving treatment with proprietary **lanreotide** or **octreotide**

## Methods

### Eligible participants

Adults aged >18 years

With diagnosed NETs or acromegaly

Received **lanreotide (LAN)** or **octreotide (OCT)** for at least the past 3 months

### PRESTO 2 e-survey

#### Primary endpoint

Injection-site pain lasting >2 days after most recent injection

Analyzed using multivariate logistic regression

#### Secondary endpoints

- Interference with daily life due to injection-site pain
- Frequency of technical injection problems

Analyzed descriptively

**Planned sample size:** 304 (minimum 76 per treatment cohort) in a 50:50 ratio ( $\pm 10\%$ )

Distributed to members of patient association groups and advocacy organizations across Canada, Ireland, the UK and the USA

## Results

Respondents  
N=304

**LAN**, n=168  
**OCT**, n=136

NETs, n=219

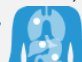

Acromegaly, n=85

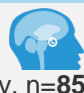

Age (mean)  
69.2%  
Sex (female)

59.6 yrs

## Primary

### Injection-site pain lasting >2 days after most recent injection

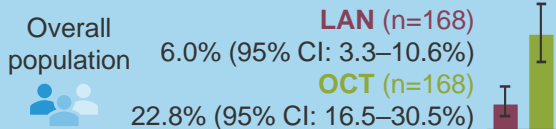

Odds of injection-site pain lasting >2 days lower for LAN than for OCT (OR, 0.13 [95% CI: 0.06–0.30];  $p < 0.0001$ )

## Secondary

### Interference with daily life due to injection-site pain at last injection<sup>a</sup>

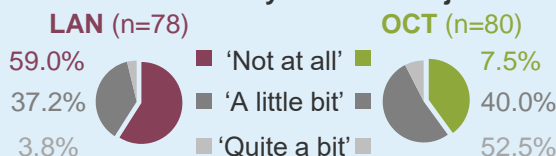

More patients reported interference with activities of daily life due to injection-site pain with OCT than with LAN<sup>b</sup>

<sup>a</sup>Percentages are based on patients who had pain at last injection.

<sup>b</sup>No patients in any group selected the highest level of interference ('very much').

## Secondary

### Frequency of technical injection problems

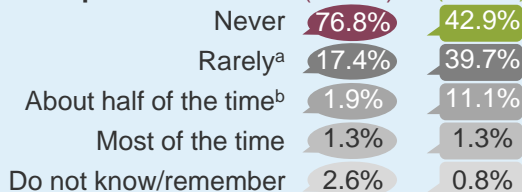

Among 281 patients treated for a period of  $\geq 6$  months with their current SSA, proportionately more patients receiving LAN than patients receiving OCT reported that they had never experienced technical injection problems

<sup>a</sup>Less than one in three injections. <sup>b</sup>Approximately one in two injections.

## Conclusions

- Fewer patients receiving proprietary LAN than receiving OCT experienced pain at the injection site lasting >2 days
- Patients receiving LAN were less likely than those receiving OCT to experience interference with daily life from perceived pain at the injection site
- This study helps to identify aspects of the injection experience that could be improved for patients receiving SSA treatment

CI, confidence interval; LAN, lanreotide autogel/depot (Somatuline<sup>®</sup>; Ipsen); NET, neuroendocrine tumor; OCT, octreotide long-acting release (Sandostatin<sup>®</sup>; Novartis); OR, odds ratio; SSA, somatostatin analog

This graphical abstract represents the opinions of the authors.

For a full list of declarations including funding and author disclosure statements, please see the full text online.

©The Authors 2022.
